# Supplementary material for: Facile synthesis of pegylated zinc(ii) phthalocyanines via transesterification and their in vitro photodynamic activities
Source: Royal Society of Chemistry journal article supplement (doi:10.1039/c1ob05955f), 2011-01-01
Supplement: c1ob05955f.pdf [file c1ob05955f.pdf]

## Electronic Supplementary Information

### Facile Synthesis of Pegylated Zinc(II) Phthalocyanines *via* Transesterification and their *in vitro* Photodynamic Activities

Ming Bai, Pui-Chi Lo, Jing Ye, Chi Wu, Wing-Ping Fong and Dennis K. P. Ng\*

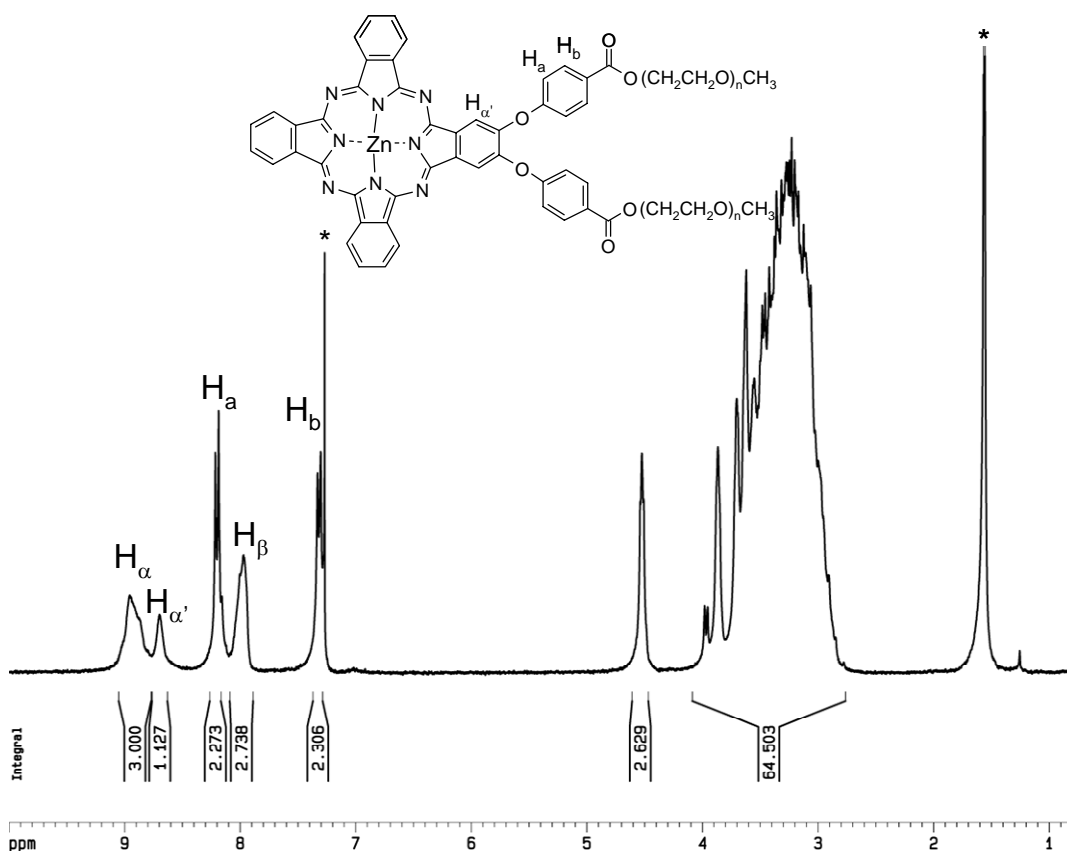

**Fig. S1** <sup>1</sup>H NMR spectrum of **1** in CDCl<sub>3</sub> with a drop of pyridine-d<sub>5</sub>.

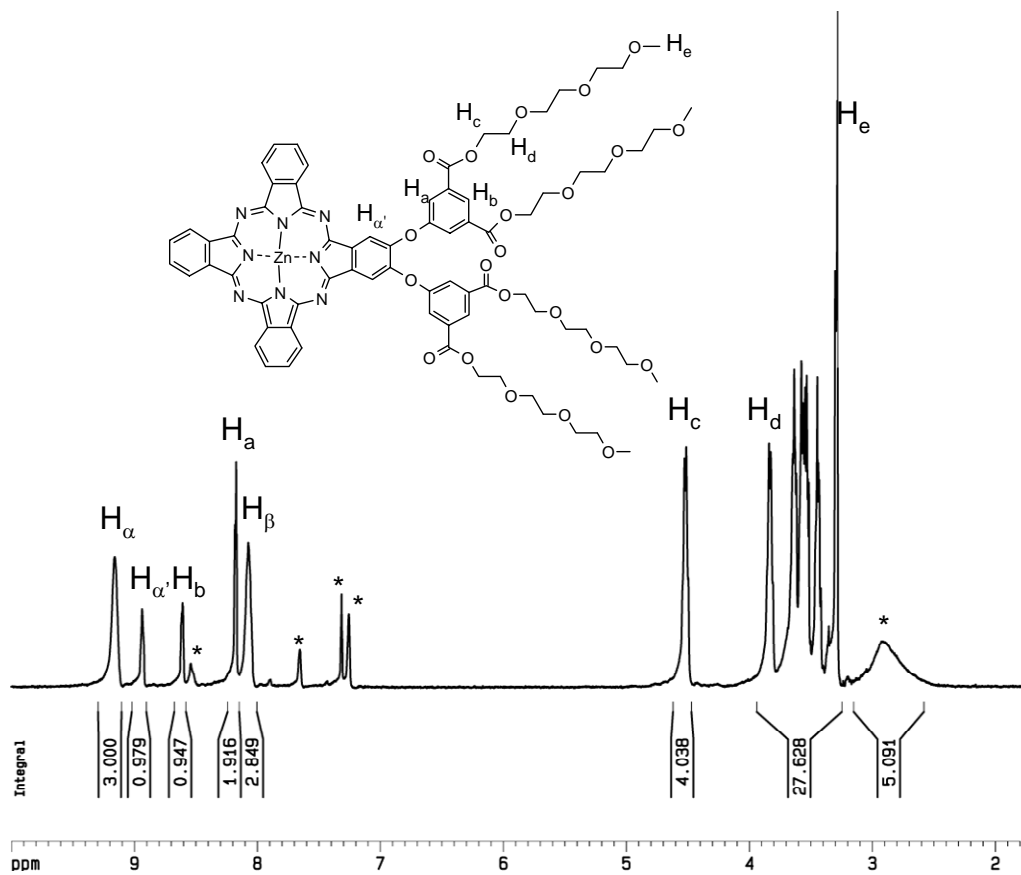

Fig. S2  $^1\text{H}$  NMR spectrum of **2** in  $\text{CDCl}_3$  with a drop of pyridine- $d_5$ .

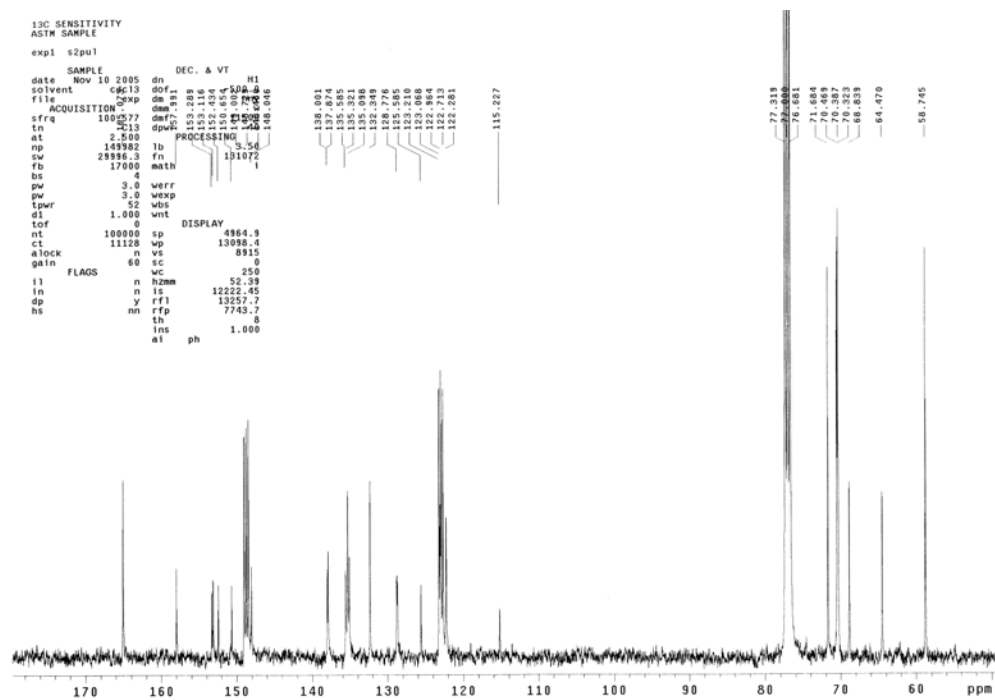

Fig. S3  $^{13}\text{C}\{^1\text{H}\}$  NMR spectrum of **2** in  $\text{CDCl}_3$  with a drop of pyridine- $d_5$ .

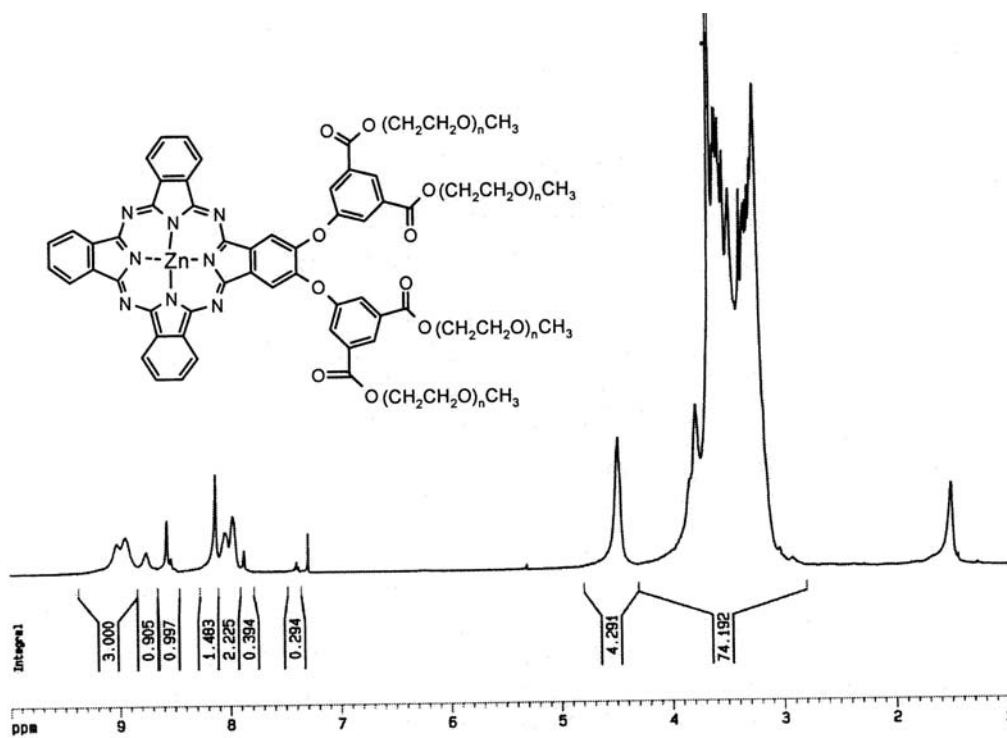

**Fig. S4** <sup>1</sup>H NMR spectrum of **3** in CDCl<sub>3</sub> with a drop of pyridine-d<sub>5</sub>.
